# Supplementary material for: Anticholinesterase Activity of Eight Medicinal Plant Species: In Vitro and In Silico Studies in the Search for Therapeutic Agents against Alzheimer's Disease
Source: Evid Based Complement Alternat Med. 2021 Jun 25;2021:9995614. doi: 10.1155/2021/9995614 (PMC8260289; doi:10.1155/2021/9995614)
Supplement: Supplementary Materials — Figure S1-1 shows details of collection and identification of Blumea lacera (Burm.f.) DC.; Figure S1-2 shows details of collection and identification of Byttneria pilosa Roxb.; Figure S1-3 shows details of collection and identification of Clerodendrum infortunatum L.; Figure S1-4 shows details of collection and identification of Cyclea barbata Miers; Figure S1-5 shows details of collection and identification of Mikania micrantha Kunth; Figure S1-6 shows details of collection and identification of Smilax guianensis Vitman; Figure S1-7 shows details of collection and identification of Spermacoce articularis L.f.; Figure S1-8 shows details of collection and identification of Thunbergia grandiflora Roxb.; Figure S2-1 shows the best rank pose (2D and 3D) of noncovalent interactions between ligand and AChE; Figure S2-2 shows the best rank pose (2D and 3D) of noncovalent interactions between ligand and AChE; Figure S3-1 shows the best rank pose (2D and 3D) of noncovalent interactions between ligand and BChE; Figure S3-2 shows the best rank pose (2D and 3D) of noncovalent interactions between ligand and BChE; Table S1 shows noncovalent interactions of BL-1, BL-4, and BL-7 with AChE; Table S2 shows noncovalent interactions of BL-5, BL-6, and BL-8 with BChE. [file 9995614.f1.docx]

SUPPEMENTARY MATERIAL

**Anticholinesterase activity of eight medicinal plant species: *in vitro* and *in silico* studies in the search for therapeutic agents against Alzheimer’s disease**

Md. Josim Uddin1, Daniela Russo2,3, Md. Mahbubur Rahman4, Shaikh Bokhtear Uddin5, Mohammad A. Halim6, Christian Zidorn1, Luigi Milella2,*

1Pharmazeutisches Institut, Abteilung Pharmazeutische Biologie, Christian-Albrechts- Universität zu Kiel, Gutenbergstraße 76, 24118 Kiel, Germany

2Department of Science, University of Basilicata, Viale dell’ Ateneo Lucano 10, 85100 Potenza, Italy

3Spinoff BioActiPlant s.r.l., Department of Science, University of Basilicata, Potenza, Italy

4Division of infectious diseases and division of computer-aided drug design, The Red-Green Research Centre, BICCB, Tejgaon, Dhaka, Bangladesh

5Department of Botany, University of Chittagong, Chattogram 4331, Bangladesh

6Department of Physical Sciences, University of Arkansas-Fort Smith, Fort Smith, Arkansas, USA

| **List of contents** |  |
| --- | --- |
| **Content** | **Page no.** |
| Figure S1-1. Details of collection and identification of *Blumea lacera* (Burm.f.) DC. | 3 |
| Figure S1-2. Details of collection and identification of *Byttneria pilosa* Roxb. | 4 |
| Figure S1-3. Details of collection and identification of *Clerodendrum infortunatum* L. | 5 |
| Figure S1-4. Details of collection and identification of *Cyclea barbata* Miers | 6 |
| Figure S1-5. Details of collection and identification of *Mikania micrantha* Kunth | 7 |
| Figure S1-6. Details of collection and identification of *Smilax guianensis* Vitman | 8 |
| Figure S1-7. Details of collection and identification of *Spermacoce articularis* L.f. | 9 |
| Figure S1-8. Details of collection and identification of *Thunbergia grandiflora* Roxb. | 10 |
| Figure S2-1. The best rank pose (2D and 3D) of non-covalent interactions between ligand and AChE | 11 |
| Figure S2-2. The best rank pose (2D and 3D) of non-covalent interactions between ligand and AChE | 12 |
| Figure S3-1. The best rank pose (2D and 3D) of non-covalent interactions between ligand and BChE | 13 |
| Figure S3-2. The best rank pose (2D and 3D) of non-covalent interactions between ligand and BChE | 14 |
| Table S1. Noncovalent interactions of BL-1, BL-4, and BL-7 with AChE | 15-16 |
| Table S2. Noncovalent interactions of BL-5, BL-6, and BL-8 with BChE | 17-18 |

**
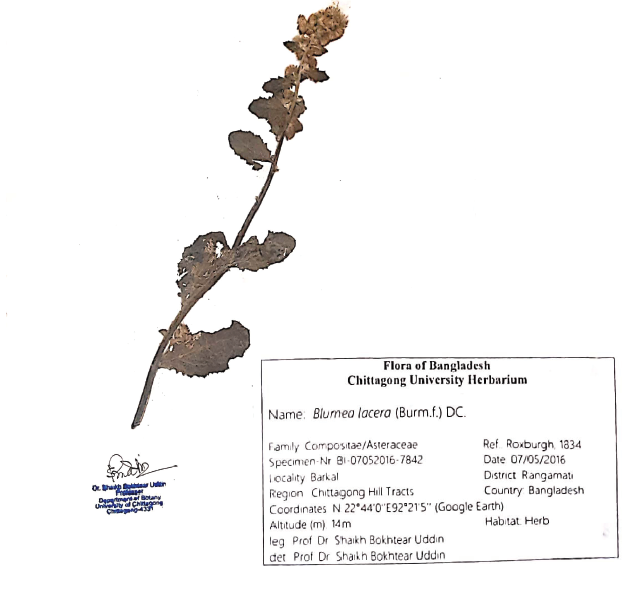
**

Figure S1-1

Figure S1-1


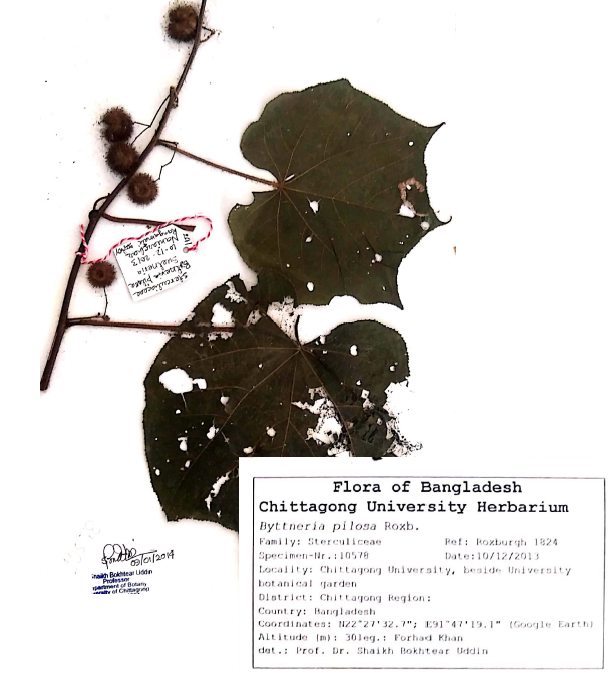


Figure S1-2


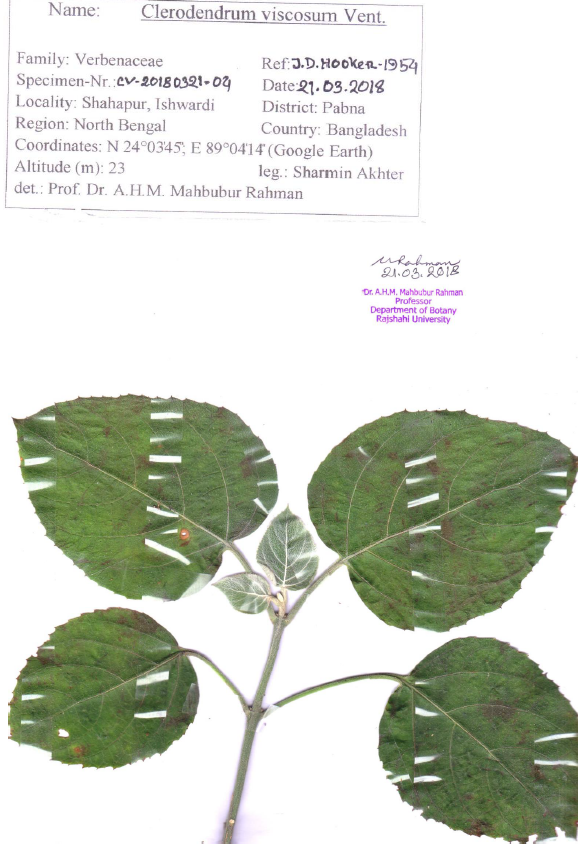


Figure S1-3


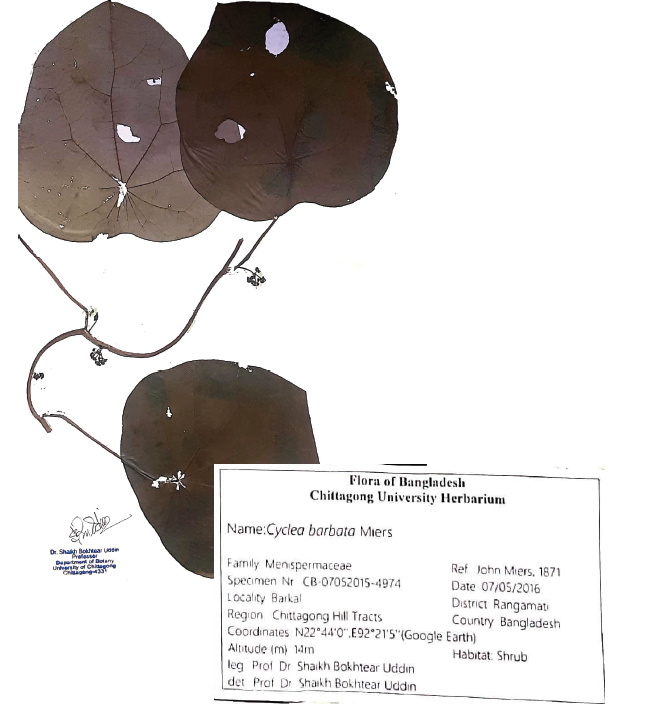


Figure S1-4


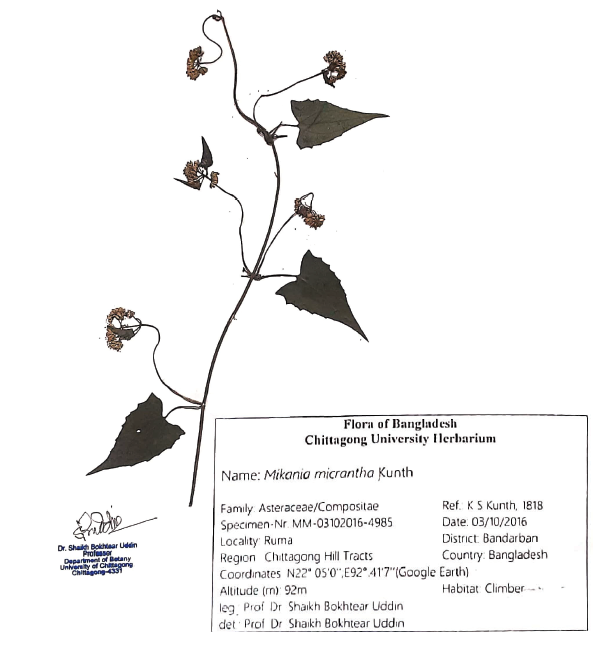


Figure S1-5


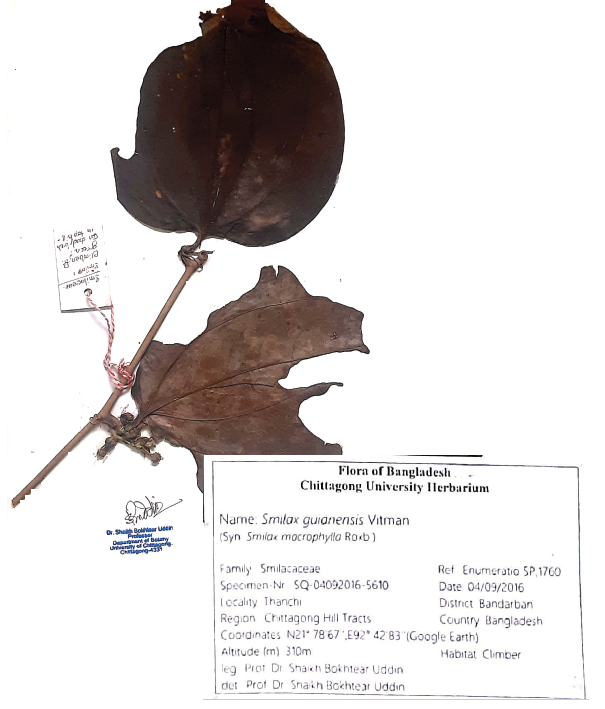


Figure S1-6


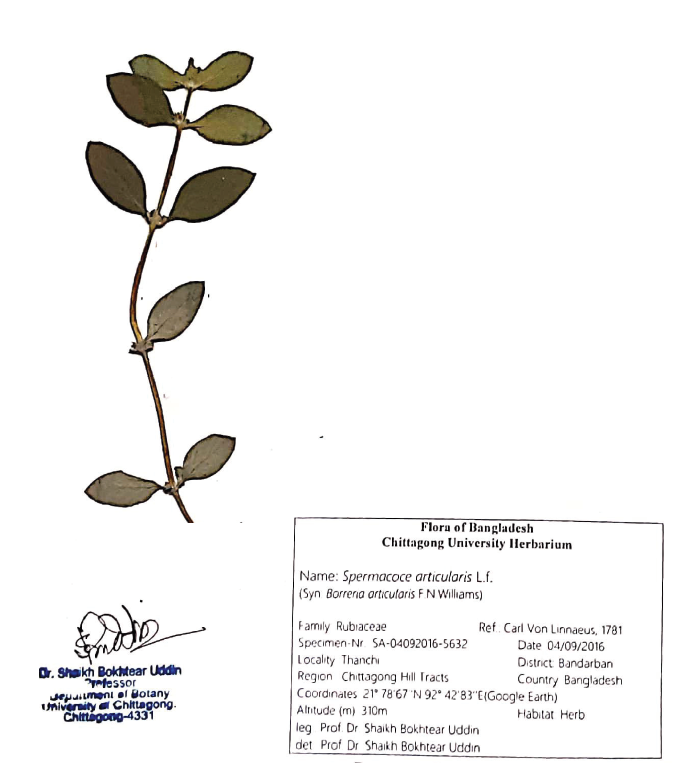


Figure S1-7


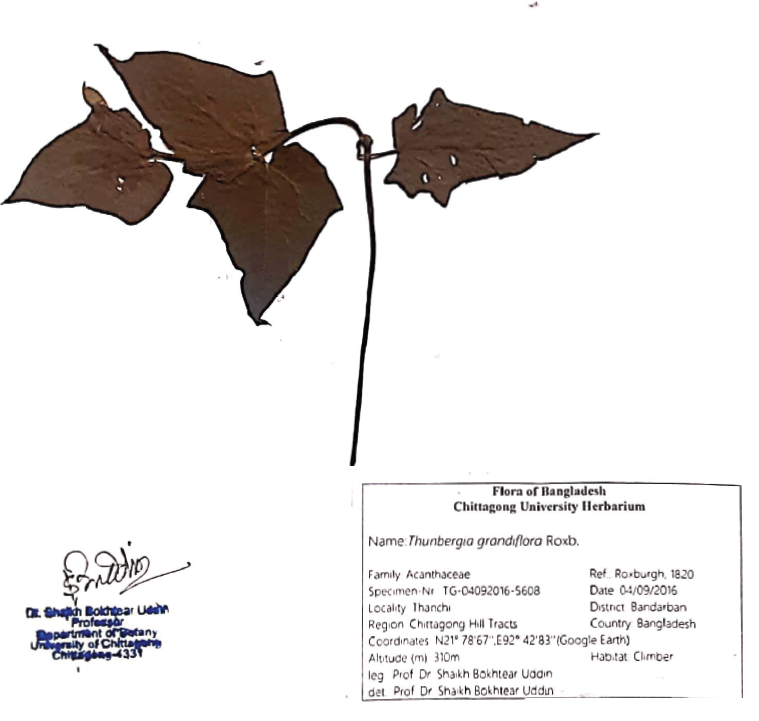


Figure S1-8


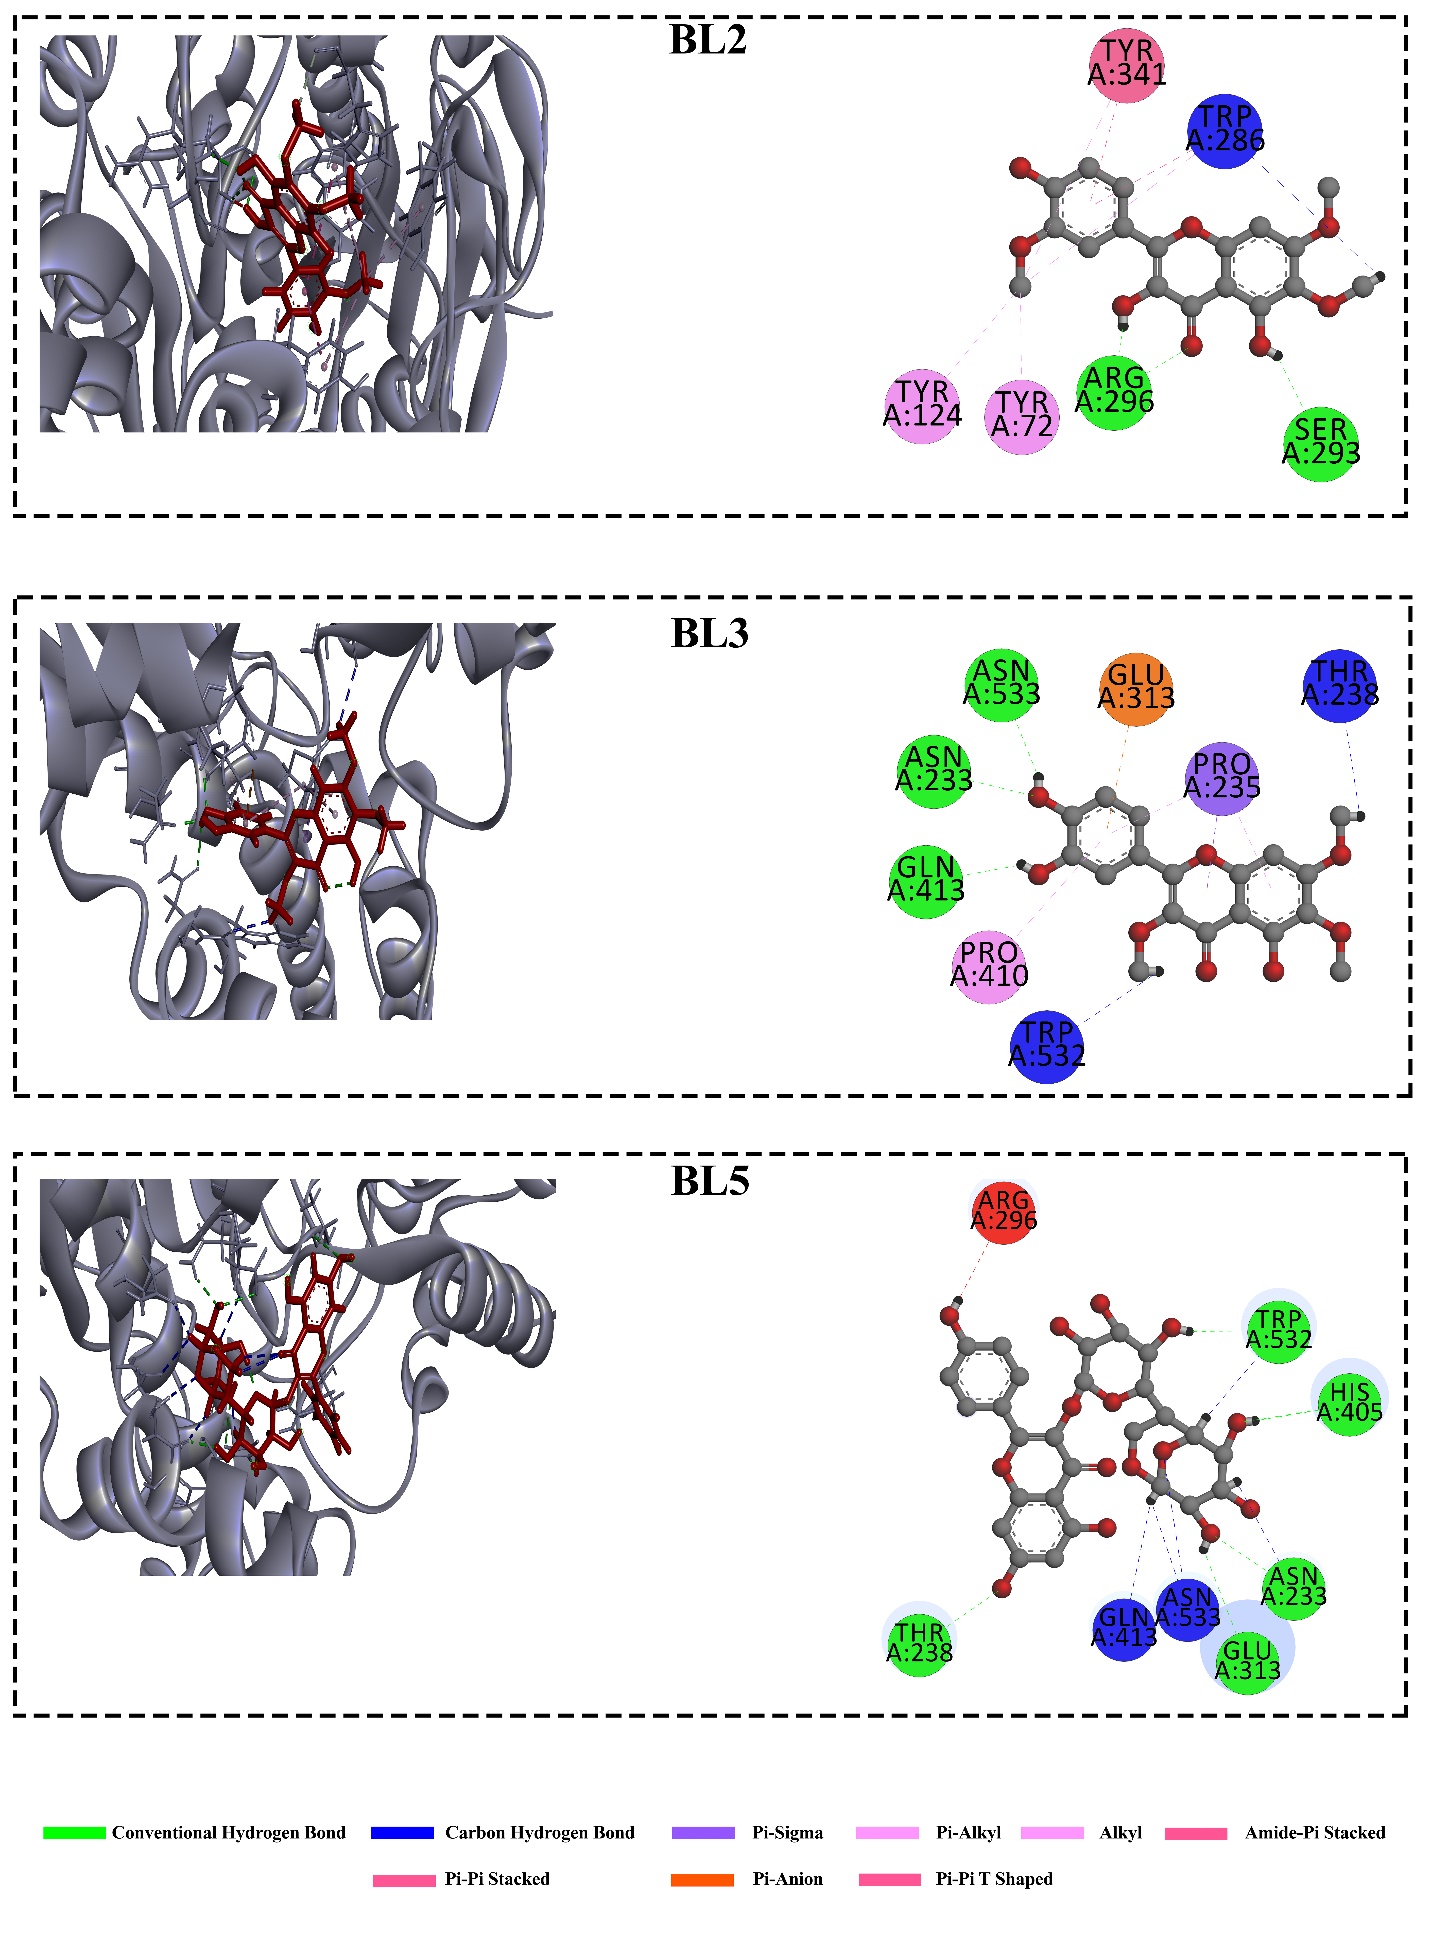
**Fig. S2-1**: The best rank pose (2D and 3D) of non-covalent interactions between ligand and AChE (PDB-ID 4EY7). In 3D, ligand molecules have been represented as red, and proteins are dark silver (pose predicted by AutoDock Vina).


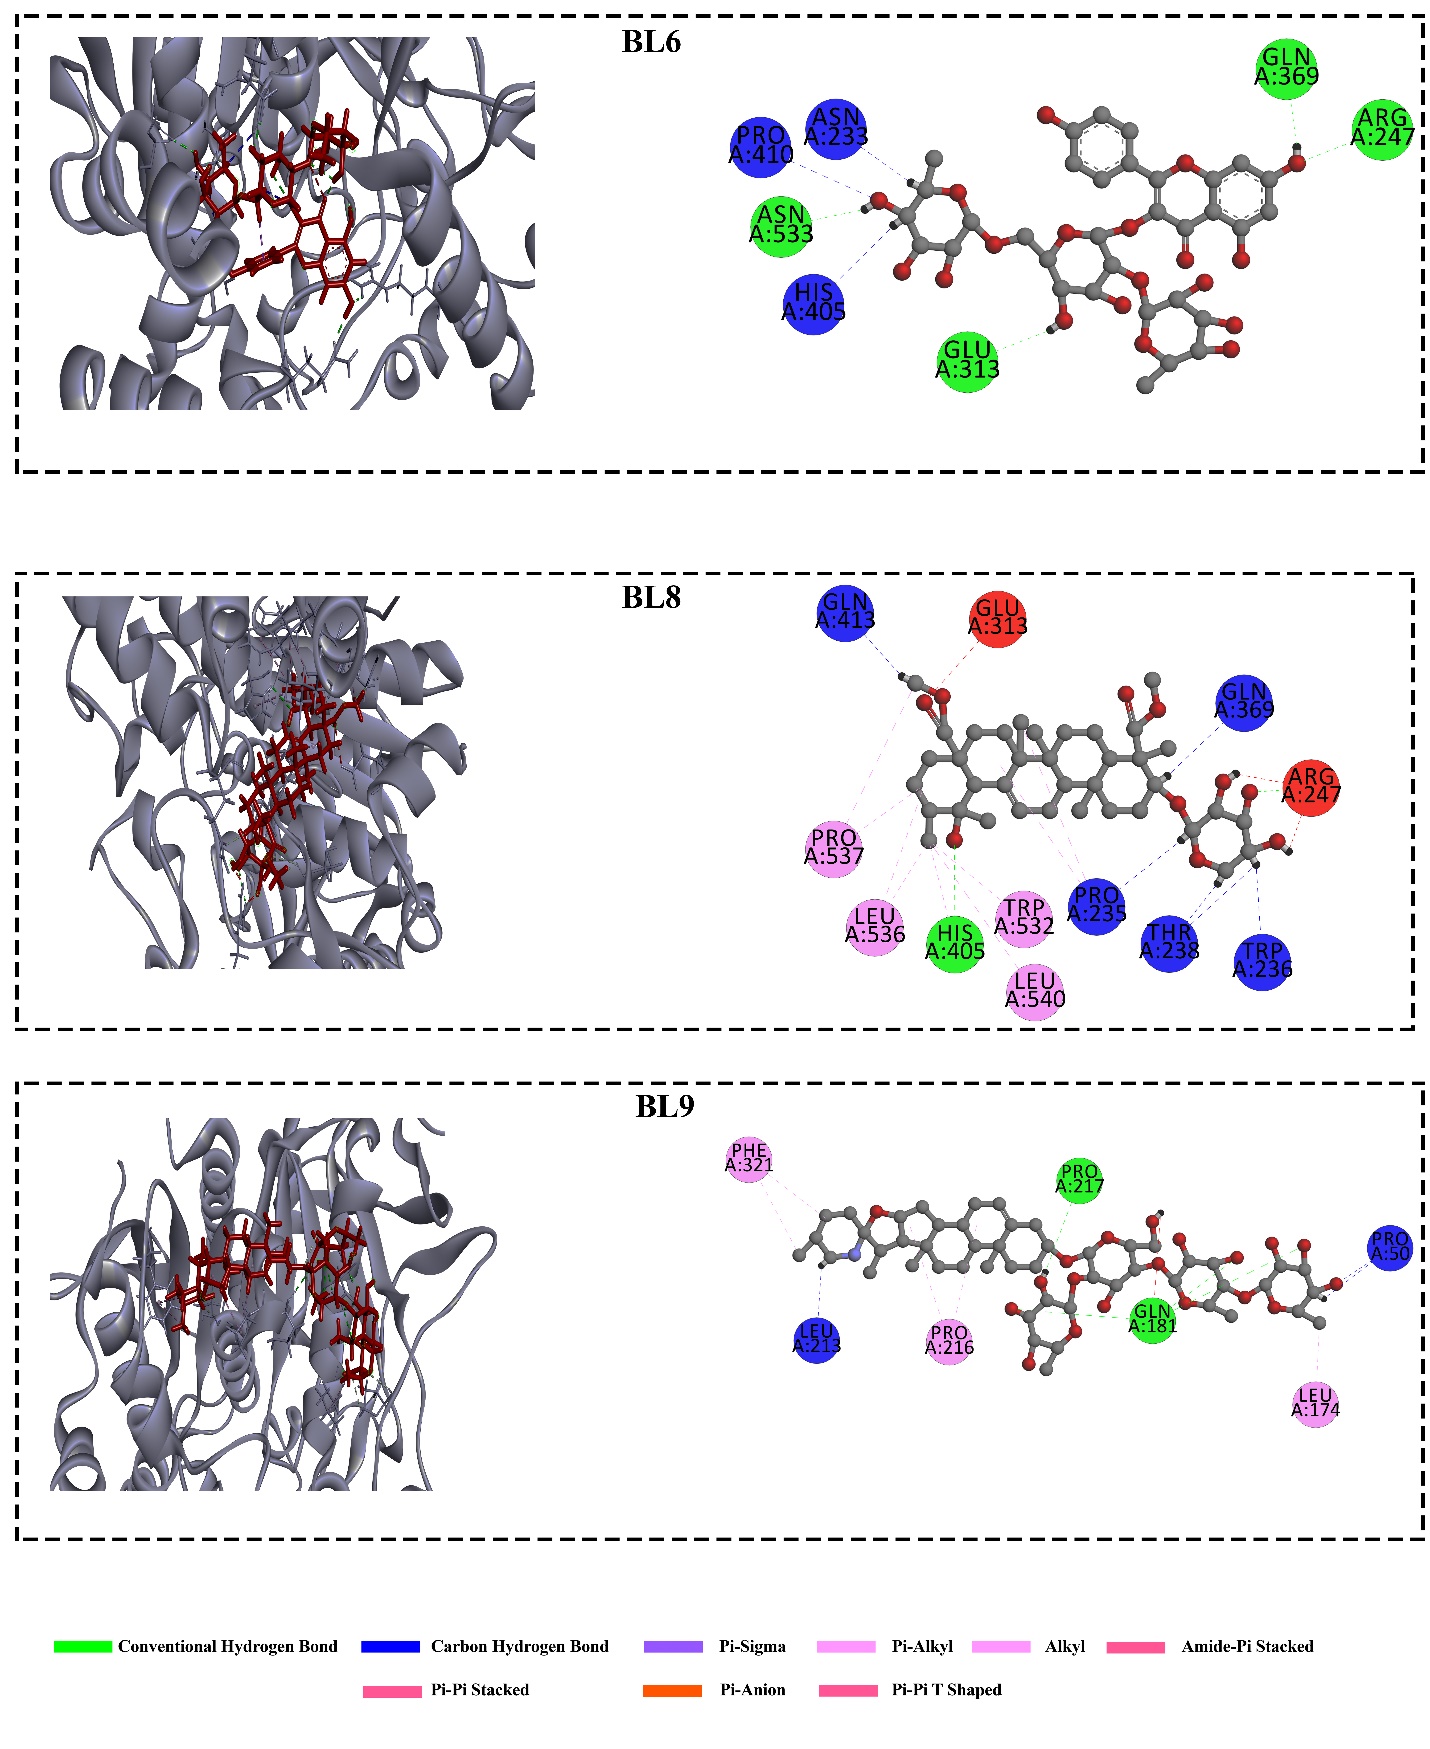
**Fig. S2-2**: The best rank pose (2D and 3D) of non-covalent interactions between ligand and AChE (PDB-ID 4EY7). In 3D, ligand molecules have been represented as red, and proteins are dark silver (pose predicted by AutoDock Vina).


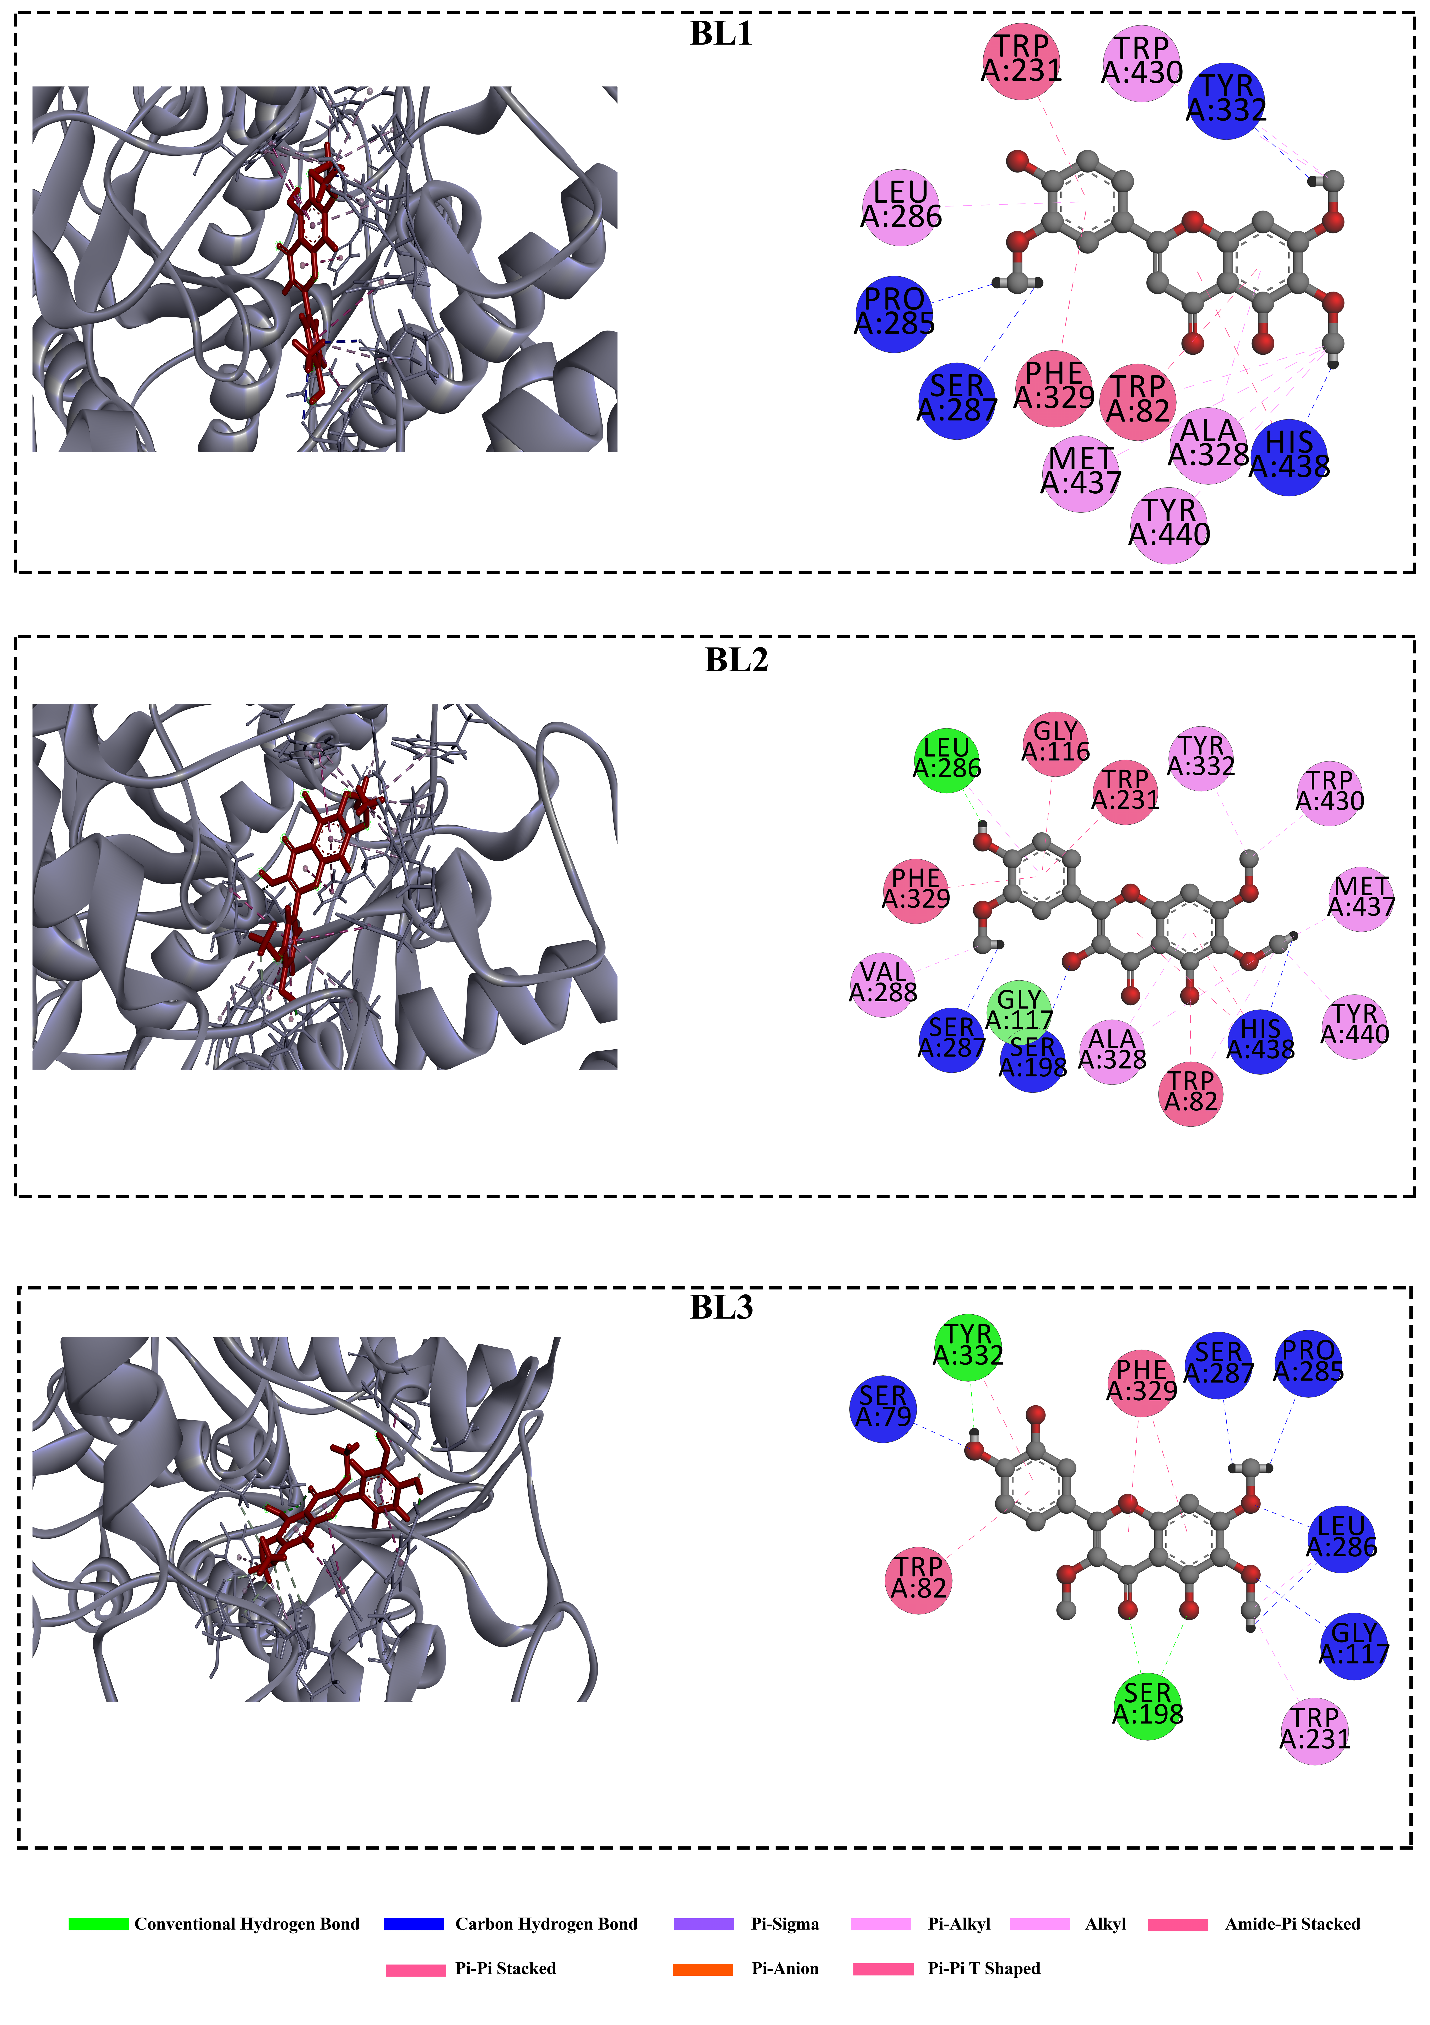
**Fig. S3-1**: The best rank pose (2D and 3D) of non-covalent interactions between ligand and BChE (PDB-ID 4AQD). In 3D, ligand molecules have been represented as red, and proteins are dark silver (pose predicted by AutoDock Vina).


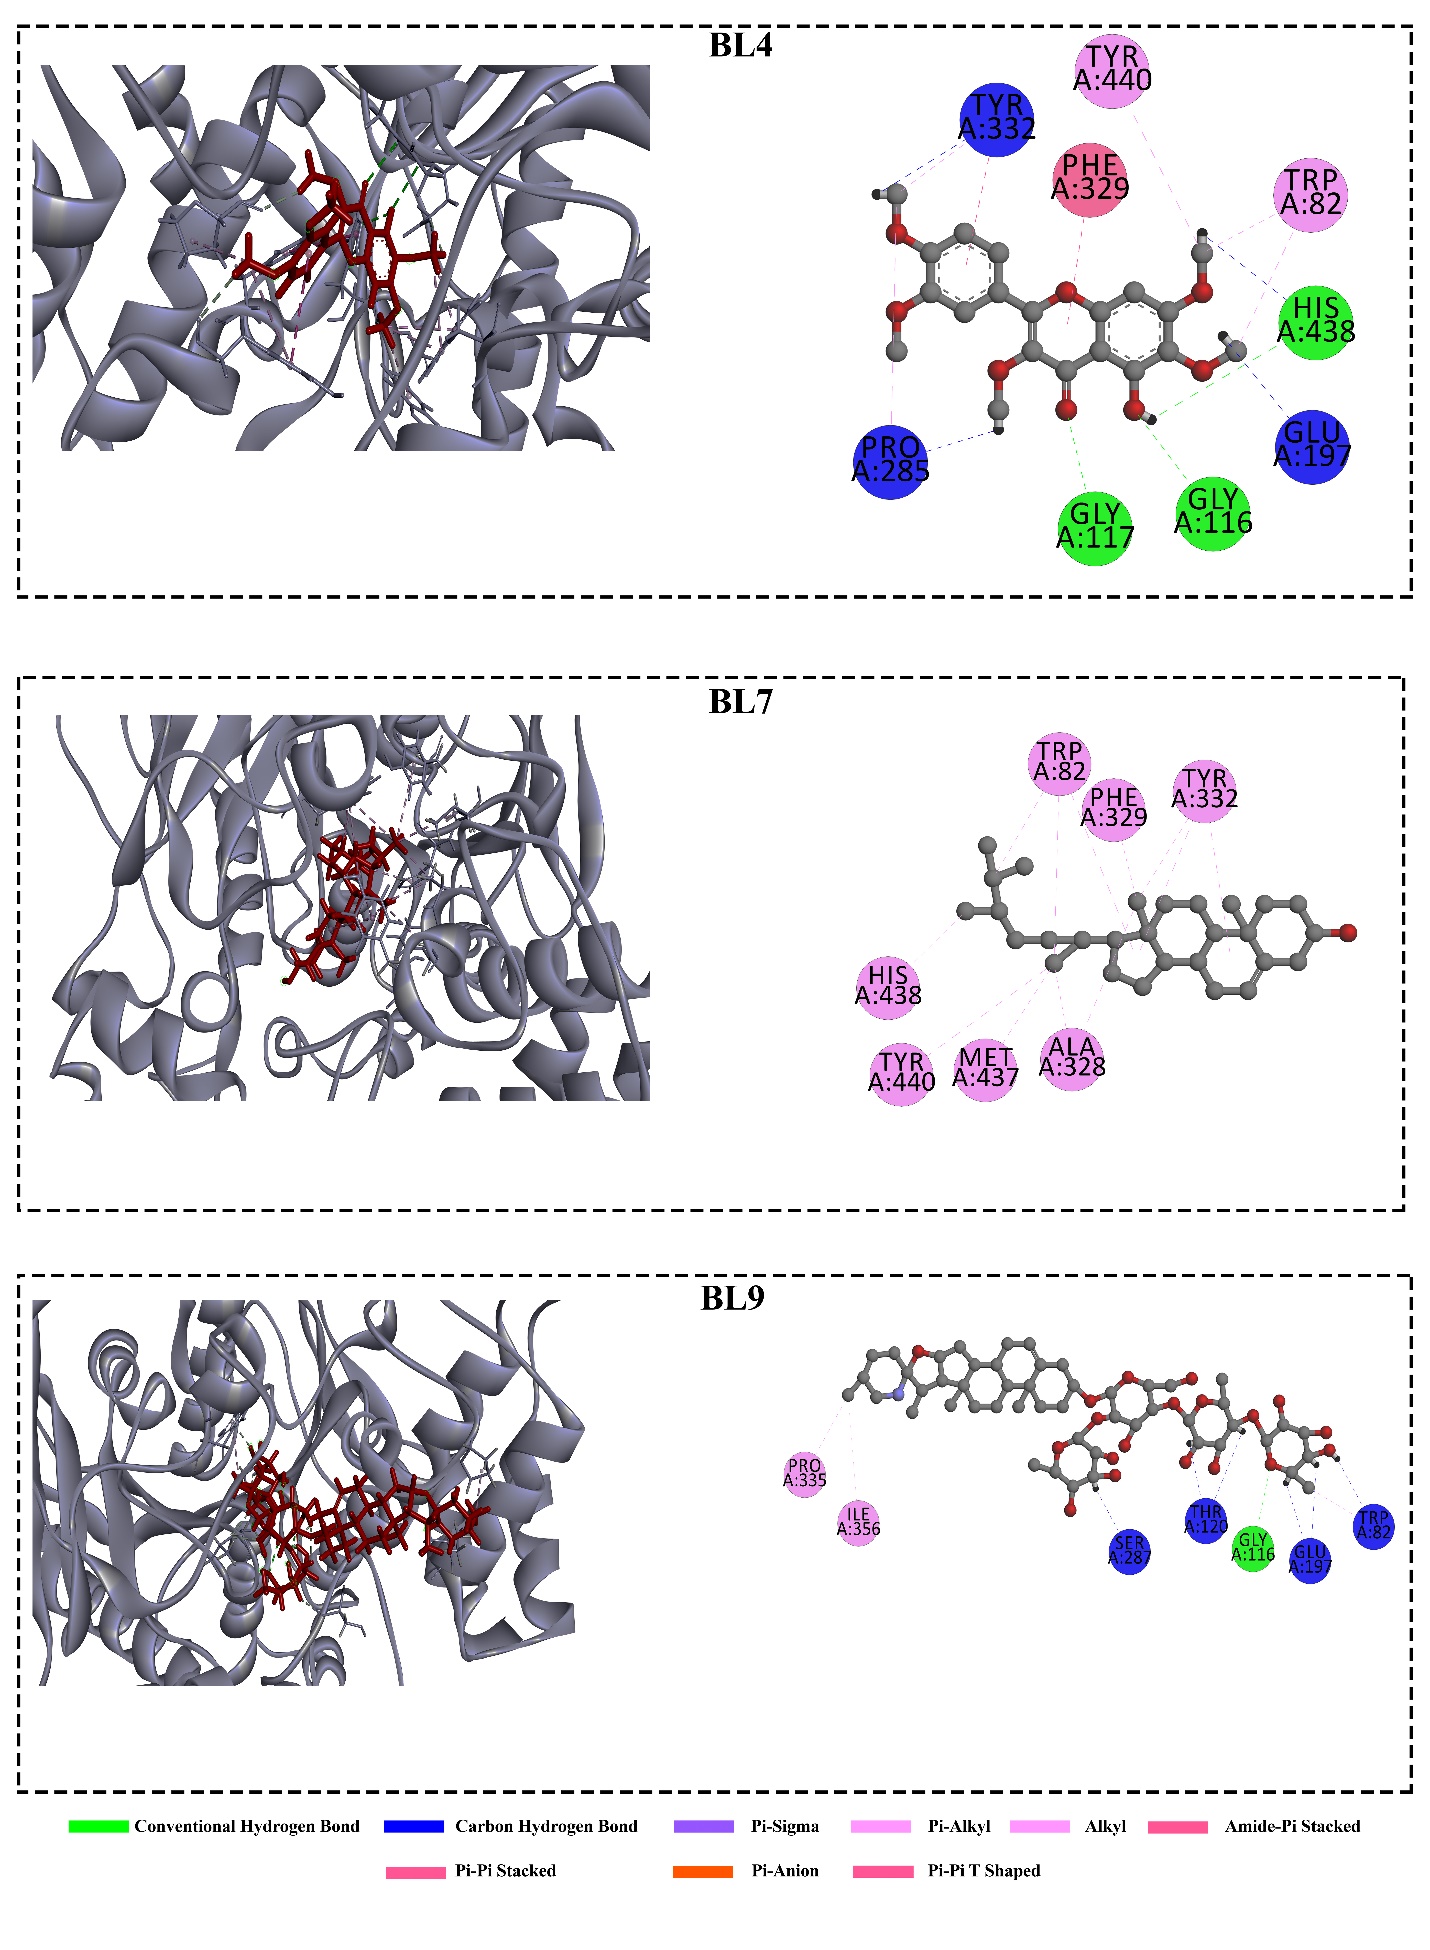
**Fig. S3-2**: The best rank pose (2D and 3D) of non-covalent interactions between ligand and BChE (PDB-ID 4AQD). In 3D, ligand molecules have been represented as red, and proteins are dark silver (pose predicted by AutoDock Vina).

**Table S1:** Noncovalent interactions of BL-1, BL-4, and BL-7 with AChE (pose predicted by AutoDock Vina)

| **Compound** | **Residue** | **Distance (Å)** | **Type** | **Category** |
| --- | --- | --- | --- | --- |
| **BL1** | Thr83 | 3.01 | Hydrogen Bond | Carbon Hydrogen Bond |
| Asp74 | 2.251 | Hydrogen Bond | Carbon Hydrogen Bond |
| Tyr124 | 2.194 | Hydrogen Bond | Pi-Donor Hydrogen Bond |
| Trp296 | 4.999 | Hydrophobic | Pi-Alkyl |
| Tyr341 | 4.512 | Hydrophobic | Pi-Alkyl |
| Tyr124 | 5.334 | Hydrophobic | Pi-Alkyl |
| Phe338 | 4.902 | Hydrophobic | Pi-Alkyl |
| Tyr341 | 5.356 | Hydrophobic | Pi-Alkyl |
| Trp86 | 5.699 | Hydrophobic | Pi-Alkyl |
| Tyr72 | 4.855 | Hydrophobic | Pi-Alkyl |
| Trp86 | 4.160 | Hydrophobic | Pi-Alkyl |
| Trp86 | 3.857 | Hydrophobic | Pi-Alkyl |
| Trp86 | 3.889 | Hydrophobic | Pi-Alkyl |
| Trp286 | 4.457 | Hydrophobic | Pi-Alkyl |
| Trp286 | 3.969 | Hydrophobic | Pi-Alkyl |
| Tyr337 | 5.319 | Hydrophobic | Pi-Alkyl |
| Tyr337 | 4.345 | Hydrophobic | Pi-Alkyl |
| Tyr341 | 5.102 | Hydrophobic | Pi-Alkyl |
| His447 | 5.498 | Hydrophobic | Pi-Alkyl |
|  | | | | |
| **BL4** | Gly121 | 2.745 | Hydrogen bond | Conventional hydrogen bond |
| Gly122 | 2.502 | Hydrogen bond | Conventional hydrogen bond |
| Ser203 | 2.344 | Hydrogen bond | Conventional hydrogen bond |
| Ser203 | 1.943 | Hydrogen bond | Conventional hydrogen bond |
| Ser293 | 2.519 | Hydrogen bond | Carbon hydrogen bond |
| Arg296 | 3.092 | Hydrogen bond | Carbon hydrogen bond |
| Asp74 | 1.846 | Hydrogen bond | Carbon hydrogen bond |
| Tyr124 | 2.82 | Hydrogen bond | Carbon hydrogen bond |
| Tyr124 | 2.646 | Hydrogen bond | Carbon hydrogen bond |
| Glu202 | 2.361 | Hydrogen bond | Carbon hydrogen bond |
| Tyr124 | 2.856 | Other | Pi-Lone pair |
| Trp286 | 5.234 | Hydrophobic | Pi-Pi stacked |
| Tyr341 | 4.52 | Hydrophobic | Pi-Pi stacked |
| Tyr124 | 5.191 | Hydrophobic | Pi-Pi T-shaped |
| Tyr341 | 5.794 | Hydrophobic | Pi-Pi T-shaped |
| Tyr124 | 5.801 | Hydrophobic | Pi-Pi T-shaped |
| Phe297 | 5.798 | Hydrophobic | Pi-Pi T-shaped |
| Tyr72 | 5.085 | Hydrophobic | Pi-Alkyl |
| Trp236 | 4.479 | Hydrophobic | Pi-Alkyl |
| Trp286 | 4.564 | Hydrophobic | Pi-Alkyl |
| Trp286 | 3.884 | Hydrophobic | Pi-Alkyl |
| Trp286 | 4.842 | Hydrophobic | Pi-Alkyl |
| Phe295 | 4.524 | Hydrophobic | Pi-Alkyl |
| Phe297 | 4.661 | Hydrophobic | Pi-Alkyl |
| Tyr341 | 4.937 | Hydrophobic | Pi-Alkyl |
| His447 | 4.892 | Hydrophobic | Pi-Alkyl |
| His447 | 4.208 | Hydrophobic | Pi-Alkyl |
|  | | | | |
| **BL7** | Glu202 | 2.987 | Hydrogen bond | Conventional hydrogen bond |
| Tyr124 | 5.453 | Hydrophobic | Pi-Alkyl |
| Tyr124 | 4.98 | Hydrophobic | Pi-Alkyl |
| Trp286 | 4.148 | Hydrophobic | Pi-Alkyl |
| Trp286 | 4.684 | Hydrophobic | Pi-Alkyl |
| Trp286 | 3.514 | Hydrophobic | Pi-Alkyl |
| Phe297 | 4.457 | Hydrophobic | Pi-Alkyl |
| Tyr337 | 4.58 | Hydrophobic | Pi-Alkyl |
| Phe338 | 4.484 | Hydrophobic | Pi-Alkyl |
| Phe338 | 4.648 | Hydrophobic | Pi-Alkyl |
| Tyr341 | 3.642 | Hydrophobic | Pi-Alkyl |
| Tyr341 | 5.177 | Hydrophobic | Pi-Alkyl |
| His447 | 4.812 | Hydrophobic | Pi-Alkyl |

**Table S2.** Noncovalent interactions of BL-5, BL-6, and BL-8 with BChE (pose predicted by AutoDock Vina)

| **Compound** | **Residue** | **Distance (Å)** | **Type** | **Category** |
| --- | --- | --- | --- | --- |
| **BL5** | Leu286 | 1.873 | Hydrogen | Conventional hydrogen bond |
| His438 | 2.543 | Hydrogen | Carbon hydrogen bond |
| Glu197 | 2.774 | Hydrogen | Carbon hydrogen bond |
| His438 | 3.028 | Hydrogen | Carbon hydrogen bond |
| Trp82 | 2.707 | Hydrogen | Carbon hydrogen bond |
| Gly116 | 2.2 | Hydrogen | Carbon hydrogen bond |
| Gly116 | 2.81 | Hydrogen | Carbon hydrogen bond |
| Ser198 | 3.071 | Hydrogen | Carbon hydrogen bond |
| His438 | 1.843 | Hydrogen | Carbon hydrogen bond |
| Gly116 | 4.734 | Hydrophobic | Amide-pi stacked |
| Leu286 | 5.413 | Hydrophobic | Pi-alkyl |
|  | | | | |
| **BL6** | Asn83 | 2.185 | Hydrogen bond | Conventional hydrogen bond |
| Glu197 | 2.08 | Hydrogen bond | Conventional hydrogen bond |
| His438 | 2.261 | Hydrogen bond | Conventional hydrogen bond |
| His438 | 2.84 | Hydrogen bond | Conventional hydrogen bond |
| Asp70 | 2.428 | Hydrogen bond | Conventional hydrogen bond |
| Tyr332 | 3.059 | Hydrogen bond | Carbon hydrogen bond |
| His438 | 2.784 | Hydrogen bond | Carbon hydrogen bond |
| Gly116 | 2.521 | Hydrophobic | Pi-sigma |
| Trp82 | 5.228 | Hydrophobic | Pi-pi t-shaped |
| Gly115 | 3.774 | Hydrophobic | Amide-pi stacked |
|  | | | | |
| **BL8** | Ala277 | 2.808 | Hydrogen bond | Conventional hydrogen bond |
| Asn289 | 2.307 | Hydrogen bond | Conventional hydrogen bond |
| Ser287 | 2.758 | Hydrogen bond | Carbon hydrogen bond |
| Thr284 | 2.93 | Hydrogen bond | Carbon hydrogen bond |
| Ala328 | 2.563 | Hydrogen bond | Carbon hydrogen bond |
| Ala277 | 2.67 | Hydrogen bond | Carbon hydrogen bond |
| Ala328 | 3.845 | Hydrophobic | Alkyl |
| Ala277 | 4.307 | Hydrophobic | Alkyl |
| Ala328 | 3.357 | Hydrophobic | Alkyl |
| Trp82 | 4.468 | Hydrophobic | Pi-Alkyl |
| Trp82 | 5.262 | Hydrophobic | Pi-Alkyl |
| Phe329 | 4.738 | Hydrophobic | Pi-Alkyl |
| Tyr332 | 4.043 | Hydrophobic | Pi-Alkyl |
| Tyr332 | 5.007 | Hydrophobic | Pi-Alkyl |
| Trp430 | 4.696 | Hydrophobic | Pi-Alkyl |
| Trp430 | 4.017 | Hydrophobic | Pi-Alkyl |
| His438 | 4.434 | Hydrophobic | Pi-Alkyl |
